# Supplementary material for: Impact of wall shear stress on initial bacterial adhesion in rotating annular reactor
Source: PubMed Central journal article supplement (PMC5312967; doi:10.1371/journal.pone.0172113), 2017-02-16
Supplement: pone.0172113.s001.pdf [file pone.0172113.s001.pdf]

**S1 Table: Results of variability experiments (phase 1) for morphological data.** Coefficients of variation based on four slides of each material (PP and PVC) per condition (i.e. wall shear stress).

|                 | Surface coverage |        | Number of particles |        | Size of particles |        |
|-----------------|------------------|--------|---------------------|--------|-------------------|--------|
|                 | PP               | PVC    | PP                  | PVC    | PP                | PVC    |
| VAR1<br>0.09 Pa | 9.8 %            | 26.3 % | 5.9 %               | 16.1 % | 12.0 %            | 17.0 % |
| VAR2<br>7.3 Pa  | 8.2 %            | 10.2 % | 10.6 %              | 11.7 % | 7.6 %             | 13.0 % |

For each slide, 60 images were recorded which was enough to create a 95% confidence interval with a margin of error of 10% of the mean. Values were slightly higher for PVC material, with one maximum at 26.3%. This is due to the heterogeneity that can exist between two slides of a same manufacturing run.
