# Supplementary material for: Impact of wall shear stress on initial bacterial adhesion in rotating annular reactor
Source: PubMed Central journal article supplement (PMC5312967; doi:10.1371/journal.pone.0172113), 2017-02-16
Supplement: pone.0172113.s002.pdf [file pone.0172113.s002.pdf]

**S2 Table: Original data from morphological structure characterization for Shear 1, Shear 2 and Mat experiments.** The two following tables give the original non-scaled results (mean and standard variation) for Shear 1 and Shear 2 experiments. The third table presents as a table data illustrated on Fig.4.

| Shear 1 | Mean                                  |                                       |                    | Standard variation                    |                                       |                    |
|---------|---------------------------------------|---------------------------------------|--------------------|---------------------------------------|---------------------------------------|--------------------|
|         | Number of particles / cm <sup>2</sup> | Size of a particle (μm <sup>2</sup> ) | Surface coverage % | Number of particles / cm <sup>2</sup> | Size of a particle (μm <sup>2</sup> ) | Surface coverage % |
| 0.09 Pa | 8.0E+05                               | 1.44                                  | 1.19               | 3.0E+05                               | 0.29                                  | 0.58               |
| 3.7 Pa  | 1.7E+06                               | 3.75                                  | 6.29               | 4.2E+05                               | 0.64                                  | 1.81               |
| 7.3 Pa  | 1.4E+06                               | 4.23                                  | 6.08               | 4.2E+05                               | 1.04                                  | 2.71               |

| Shear 2 | Mean                                  |                                       |                    | Standard variation                    |                                       |                    |
|---------|---------------------------------------|---------------------------------------|--------------------|---------------------------------------|---------------------------------------|--------------------|
|         | Number of particles / cm <sup>2</sup> | Size of a particle (μm <sup>2</sup> ) | Surface coverage % | Number of particles / cm <sup>2</sup> | Size of a particle (μm <sup>2</sup> ) | Surface coverage % |
| 0.09 Pa | 1.7E+06                               | 1.48                                  | 2.48               | 3.1E+05                               | 0.24                                  | 0.62               |
| 0.79 Pa | 9.8E+05                               | 1.49                                  | 1.48               | 2.3E+05                               | 0.32                                  | 0.49               |
| 7.3 Pa  | 2.4E+06                               | 5.91                                  | 13.45              | 6.7E+05                               | 1.78                                  | 3.28               |

| Mat |         | Mean                                  |                                       |                    | Standard variation                    |                                       |                    |
|-----|---------|---------------------------------------|---------------------------------------|--------------------|---------------------------------------|---------------------------------------|--------------------|
|     |         | Number of particles / cm <sup>2</sup> | Size of a particle (μm <sup>2</sup> ) | Surface coverage % | Number of particles / cm <sup>2</sup> | Size of a particle (μm <sup>2</sup> ) | Surface coverage % |
| PP  | 0.09 Pa | 5.5E+05                               | 1.29                                  | 0.71               | 1.1E+05                               | 0.23                                  | 0.20               |
|     | 7.3 Pa  | 1.4E+06                               | 1.74                                  | 2.42               | 4.3E+05                               | 0.29                                  | 0.75               |
| PVC | 0.09 Pa | 2.0E+05                               | 0.65                                  | 0.13               | 8.5E+04                               | 0.13                                  | 0.07               |
|     | 7.3 Pa  | 5.1E+05                               | 1.04                                  | 0.55               | 1.5E+05                               | 0.24                                  | 0.24               |
