# Supplementary material for: Impact of wall shear stress on initial bacterial adhesion in rotating annular reactor
Source: PubMed Central journal article supplement (PMC5312967; doi:10.1371/journal.pone.0172113), 2017-02-16

**S2 Figure: Original PCR-SSCP profiles of Shear 1, Shear 2 and Mat experiments.** The three following figures present the microbiological characterization of inoculum and attached bacteria on the slides for Shear 1, Shear 2 and Mat experiments. All replicas are shown.

**Shear 1 experiment:**

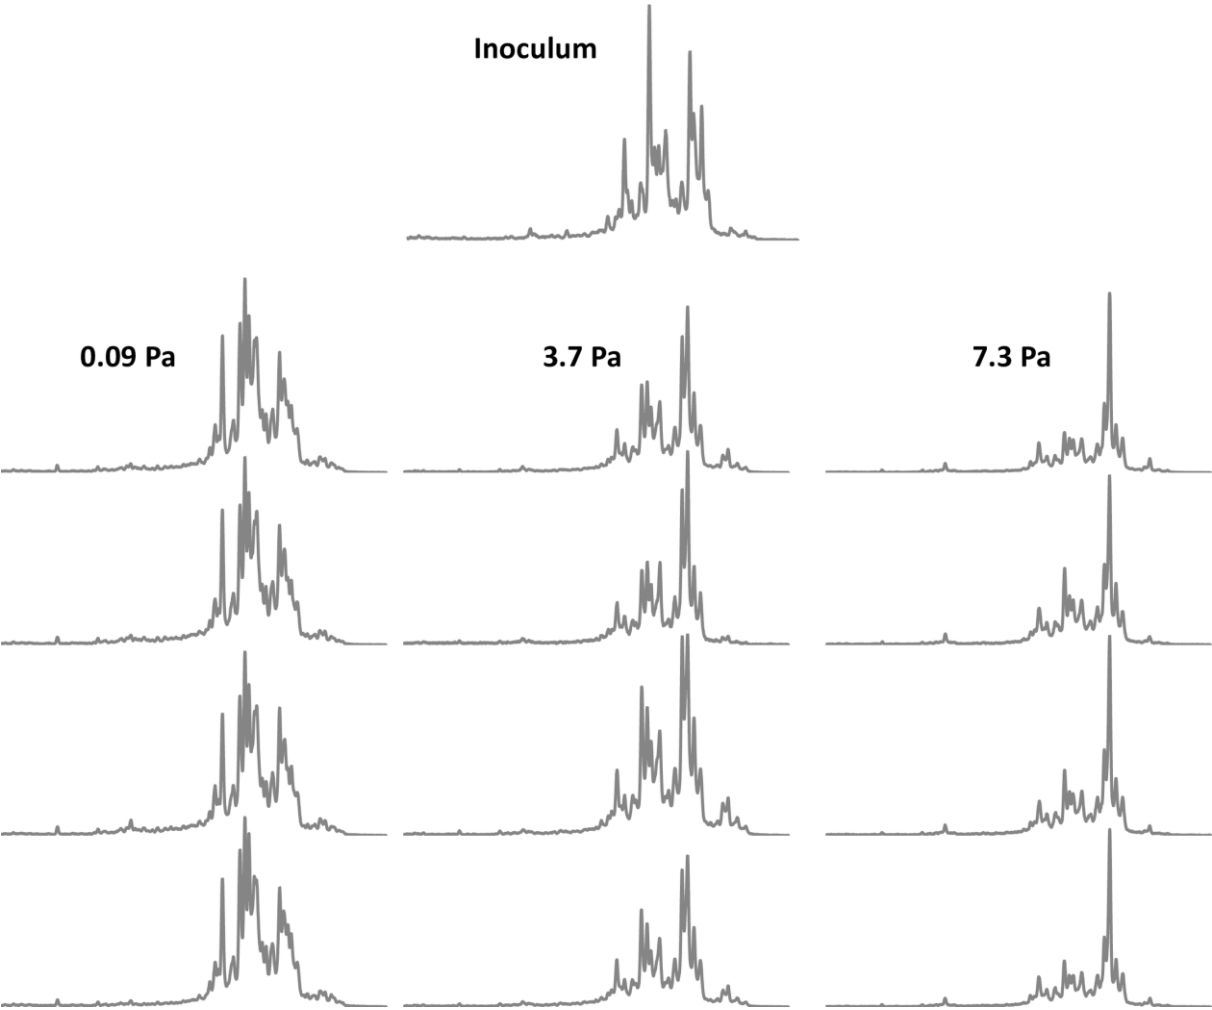

**Shear 2 experiment:**

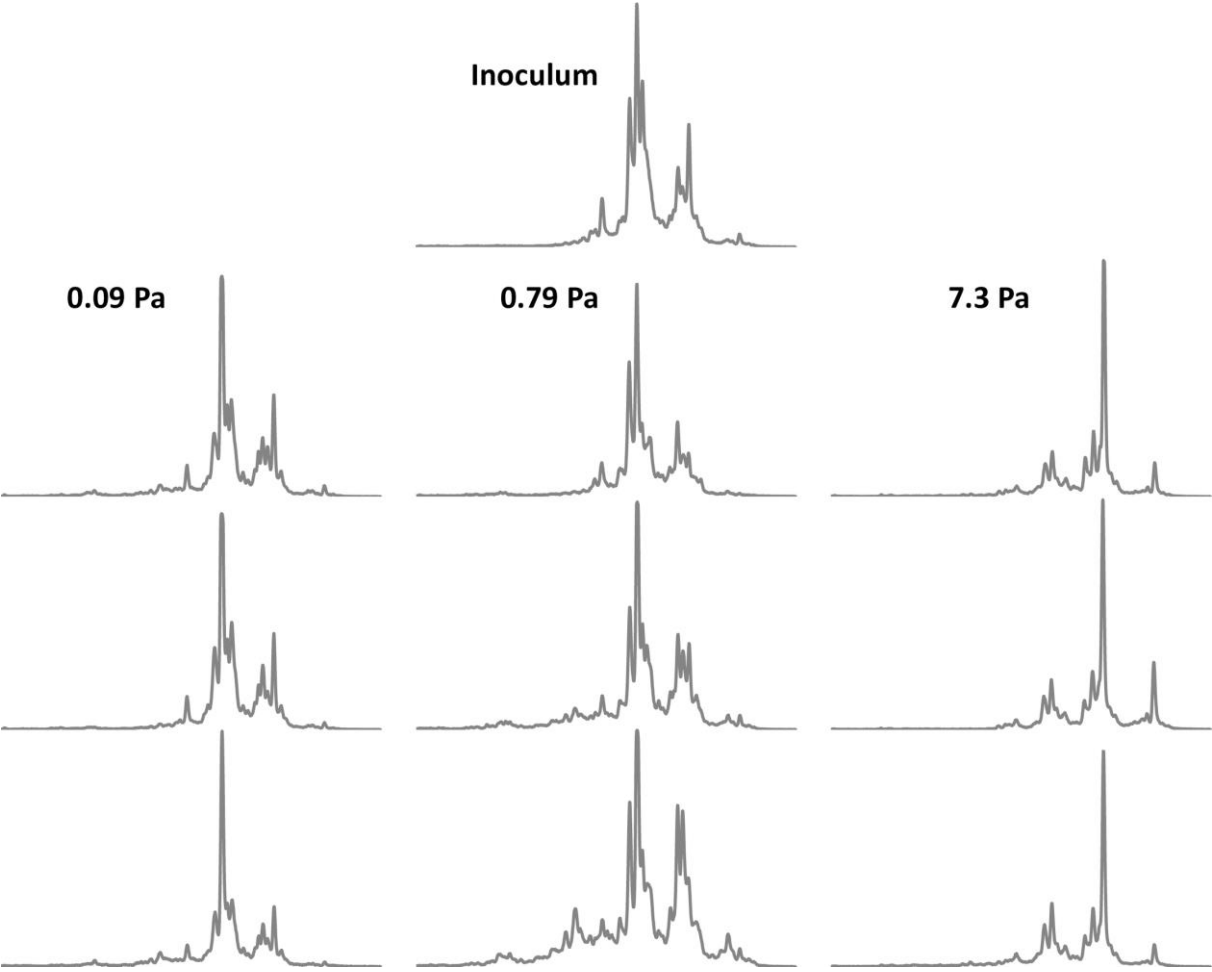

**Mat experiment:**

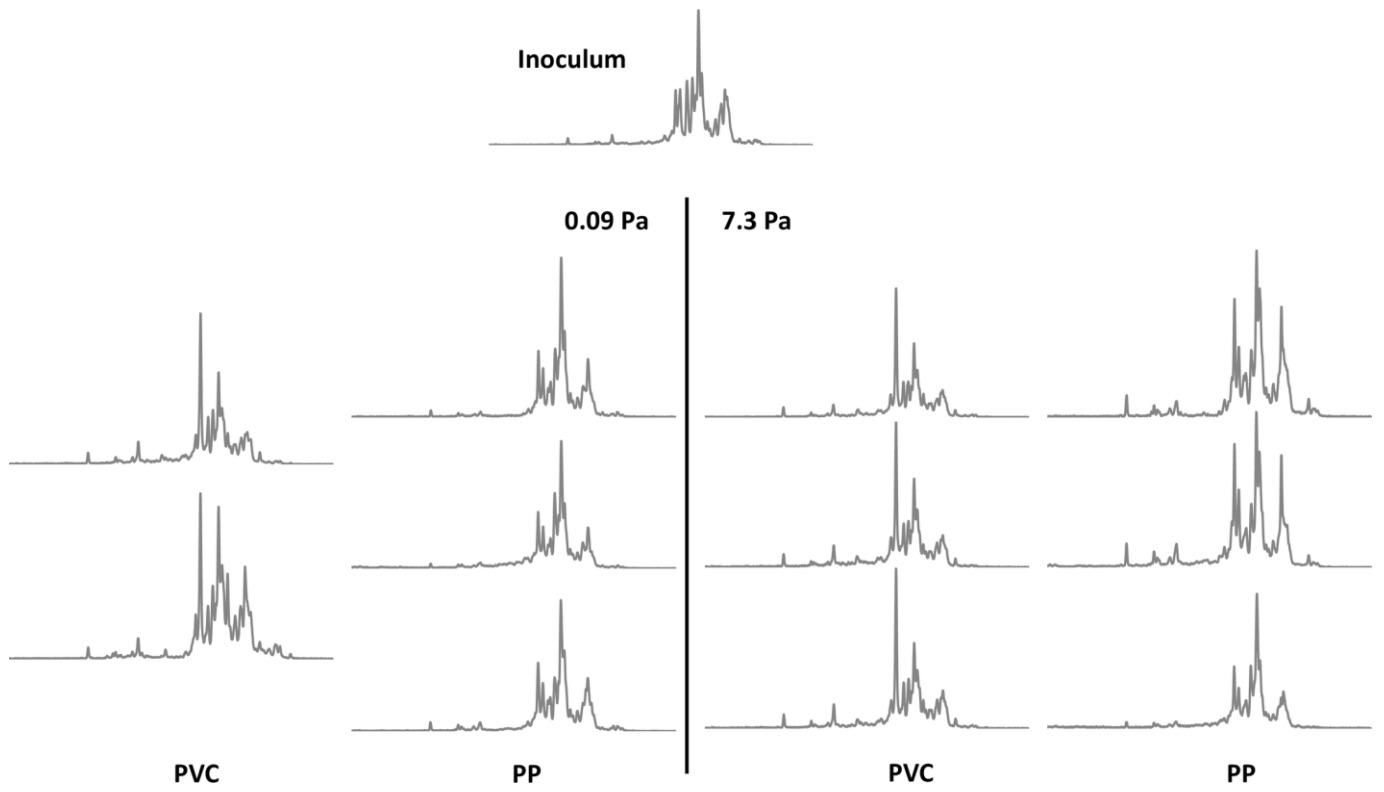

Supplement: pone.0172113.s005.pdf [file pone.0172113.s005.pdf]
